# Supplementary material
Source: publisher figshare collection journal article supplement (https://acs.figshare.com/ndownloader/files/3951385)
Supplement: Supplementary file 1 [file 3951385]

## **Supporting Information**

### **Supporting Information Materials and Methods**

#### **In-gel digestion**

Gel pieces were sliced into  $\sim 1 \text{ mm}^3$  cubes and de-stained with 50 mM ammonium bicarbonate in a 50% ACN aqueous solution at 37°C for 45 min. Subsequently, the gel pieces were dehydrated in 70% ACN, then 100% ACN, reduced with 10 mM DTT, and alkylated with 50 mM iodoacetamide. The gel pieces were once again washed and dehydrated. After the gels were fully dried, they were rehydrated with 25 ng/ $\mu\text{L}$  of sequencing-grade trypsin in freshly prepared reaction buffer (50 mM ammonium bicarbonate, 0.1 mM  $\text{CaCl}_2$ , pH 8.0). Any remaining solution was discarded from the gels, and 50  $\mu\text{L}$  of additional reaction buffer was added. After overnight incubation at 37°C, 50  $\mu\text{L}$  of 10% formic acid/10% ACN solution was added, and the digested peptides were extracted by ultrasonication. Then, the peptides were extracted using 100  $\mu\text{L}$  of a 0.1% trifluoroacetic acid (TFA)/50% ACN solution, followed by a 0.1% TFA/70% ACN solution, and finally a 0.1% TFA/100% ACN solution. The collected peptides were dried in a SpeedVac vacuum evaporator and reconstituted in 10  $\mu\text{L}$  of 0.1% formic acid in distilled water. The samples were centrifuged prior to LC-MS/MS injection.

#### **Solvent gradients and parameters for the LC-MS/MS analysis**

The peptides were eluted using the mobile phase gradient of solvent A (0.1% formic acid in water) and B (0.1% formic acid in ACN) with a flow rate of 200 nL/min. The gradient started with 2% solvent B and increased to 50% by 100 min, then increased to 100% by 105 min. After 5 min of maintaining 100% solvent B (washing), the column was equilibrated with 98% solvent A and 2% solvent B for another 10 min. The eluted peptides were ionized by nanospray with a voltage of 1.4 kV and submitted to the mass spectrometer. Peptide ions were first analyzed with a full-MS scan in a range of 300-2000 m/z, and the top 7 most intense ions from the full-MS scan were data-dependently selected for CID tandem MS analysis (normalized collision energy of 35 for 30 msec). The following dynamic exclusion parameters of the data-dependent scan were used: repeat count = 2, repeat duration = 30 sec, list size = 300, exclusion duration = 180 sec, low mass width = 0.8, and high mass width = 2.2.

#### **Protein identification through database searching**

In detail, SEQUEST was searched with a fragment ion mass tolerance of 1.00 Da and a parent ion tolerance of 1.00 Da. Iodoacetamide derivatives of cysteine and methionine oxidation were specified as a fixed modification and a variable modification, respectively. Peptide identifications were accepted if they exceeded the following thresholds: DeltaCn scores greater than 0.10 and XCorr scores greater than 1.8, 2.5, 3.5 and 3.5 for singly, doubly, triply, and quadruply charged peptides. Protein identifications were accepted if they contained at least 2 identified peptides, and proteins that contained similar peptides that could not be differentiated based on MS/MS analysis alone were grouped to satisfy the principles of parsimony.

**Table S1.** List of the down-regulated secretory proteins (70 proteins).

| Gene symbol | Accession # | MW  | Mean $\pm$ SD<br>of Control | Mean $\pm$ SD<br>of GKB treated | <i>p</i> value <sup>a</sup> | Rsc <sup>a</sup> |
|-------------|-------------|-----|-----------------------------|---------------------------------|-----------------------------|------------------|
| ADAM9       | IPI00440932 | 91  | 0.8 $\pm$ 0.5               | 0.0 $\pm$ 0.0                   | 0.039                       | −∞               |
| AGRN        | IPI00374563 | 215 | 0.9 $\pm$ 0.2               | 0.0 $\pm$ 0.0                   | 0.003                       | −∞               |
| ATRN        | IPI00162735 | 141 | 1.0 $\pm$ 0.4               | 0.0 $\pm$ 0.0                   | 0.010                       | −∞               |
| B4GALT1     | IPI00215767 | 44  | 0.7 $\pm$ 0.4               | 0.0 $\pm$ 0.0                   | 0.038                       | −∞               |
| BMP1        | IPI00009054 | 111 | 2.3 $\pm$ 0.6               | 0.0 $\pm$ 0.0                   | 0.004                       | −∞               |
| CILP2       | IPI00216780 | 127 | 0.6 $\pm$ 0.2               | 0.0 $\pm$ 0.0                   | 0.007                       | −∞               |
| COCH        | IPI00012386 | 59  | 0.6 $\pm$ 0.1               | 0.0 $\pm$ 0.0                   | 0.001                       | −∞               |
| COL18A1     | IPI00022822 | 154 | 1.8 $\pm$ 0.4               | 0.0 $\pm$ 0.0                   | 0.002                       | −∞               |
| COL6A2      | IPI00304840 | 109 | 0.9 $\pm$ 0.3               | 0.0 $\pm$ 0.0                   | 0.006                       | −∞               |
| CPE         | IPI00031121 | 64  | 1.9 $\pm$ 0.6               | 0.0 $\pm$ 0.0                   | 0.007                       | −∞               |
| CXCL16      | IPI00004946 | 30  | 0.8 $\pm$ 0.5               | 0.0 $\pm$ 0.0                   | 0.046                       | −∞               |
| DKK1        | IPI00016353 | 29  | 0.8 $\pm$ 0.4               | 0.0 $\pm$ 0.0                   | 0.023                       | −∞               |
| ECM1        | IPI00003351 | 61  | 0.4 $\pm$ 0.1               | 0.0 $\pm$ 0.0                   | 0.001                       | −∞               |
| F2          | IPI00019568 | 70  | 0.4 $\pm$ 0.1               | 0.0 $\pm$ 0.0                   | 0.001                       | −∞               |
| FBLN1       | IPI00296534 | 77  | 0.7 $\pm$ 0.2               | 0.0 $\pm$ 0.0                   | 0.007                       | −∞               |
| FBLN1       | IPI00296537 | 74  | 1.0 $\pm$ 0.1               | 0.0 $\pm$ 0.0                   | 0.000                       | −∞               |
| FGF19       | IPI00032908 | 24  | 1.4 $\pm$ 0.1               | 0.0 $\pm$ 0.0                   | 0.000                       | −∞               |
| FN1         | IPI00022418 | 263 | 1.2 $\pm$ 0.5               | 0.0 $\pm$ 0.0                   | 0.013                       | −∞               |
| FSTL1       | IPI00029723 | 35  | 1.6 $\pm$ 0.9               | 0.0 $\pm$ 0.0                   | 0.046                       | −∞               |
| FUCA2       | IPI00012440 | 54  | 0.8 $\pm$ 0.0               | 0.0 $\pm$ 0.0                   | N/A <sup>b</sup>            | −∞               |
| GALNT2      | IPI00004669 | 65  | 1.2 $\pm$ 0.6               | 0.0 $\pm$ 0.0                   | 0.017                       | −∞               |
| GDF15       | IPI00306543 | 34  | 1.1 $\pm$ 0.1               | 0.0 $\pm$ 0.0                   | 0.000                       | −∞               |
| HAPLN3      | IPI00045527 | 48  | 1.4 $\pm$ 0.4               | 0.0 $\pm$ 0.0                   | 0.003                       | −∞               |
| HSPG2       | IPI00024284 | 469 | 7.4 $\pm$ 0.9               | 0.0 $\pm$ 0.0                   | 0.000                       | −∞               |
| IGFBP6      | IPI00029235 | 25  | 1.5 $\pm$ 0.5               | 0.0 $\pm$ 0.0                   | 0.006                       | −∞               |
| KITLG       | IPI00220142 | 28  | 1.0 $\pm$ 0.1               | 0.0 $\pm$ 0.0                   | 0.000                       | −∞               |
| KLK10       | IPI00480121 | 30  | 1.0 $\pm$ 0.6               | 0.0 $\pm$ 0.0                   | 0.048                       | −∞               |
| LAMA3       | IPI00377045 | 367 | 1.2 $\pm$ 0.7               | 0.0 $\pm$ 0.0                   | 0.045                       | −∞               |
| LAMA5       | IPI00783665 | 400 | 5.3 $\pm$ 1.1               | 0.0 $\pm$ 0.0                   | 0.001                       | −∞               |
| LAMB1       | IPI00013976 | 198 | 3.2 $\pm$ 0.3               | 0.0 $\pm$ 0.0                   | 0.000                       | −∞               |
| LAMB2       | IPI00296922 | 196 | 0.7 $\pm$ 0.1               | 0.0 $\pm$ 0.0                   | 0.000                       | −∞               |
| LAMB3       | IPI00299404 | 130 | 1.0 $\pm$ 0.5               | 0.0 $\pm$ 0.0                   | 0.021                       | −∞               |
| LAMC1       | IPI00298281 | 178 | 2.8 $\pm$ 0.6               | 0.0 $\pm$ 0.0                   | 0.002                       | −∞               |
| LAMC2       | IPI00015117 | 131 | 0.7 $\pm$ 0.4               | 0.0 $\pm$ 0.0                   | 0.035                       | −∞               |
| LCN2        | IPI00299547 | 23  | 1.8 $\pm$ 0.4               | 0.0 $\pm$ 0.0                   | 0.002                       | −∞               |
| LOXL2       | IPI00294839 | 87  | 1.0 $\pm$ 0.3               | 0.0 $\pm$ 0.0                   | 0.005                       | −∞               |
| MAMDC2      | IPI00183750 | 78  | 1.1 $\pm$ 0.1               | 0.0 $\pm$ 0.0                   | 0.000                       | −∞               |
| PAM         | IPI00177543 | 108 | 2.8 $\pm$ 1.2               | 0.0 $\pm$ 0.0                   | 0.013                       | −∞               |
| PLAT        | IPI00019590 | 63  | 0.6 $\pm$ 0.2               | 0.0 $\pm$ 0.0                   | 0.004                       | −∞               |

|                 |             |     |            |           |       |        |
|-----------------|-------------|-----|------------|-----------|-------|--------|
| <b>PLAU</b>     | IPI00296180 | 49  | 1.0 ± 0.4  | 0.0 ± 0.0 | 0.008 | -∞     |
| <b>PROS1</b>    | IPI00294004 | 75  | 0.6 ± 0.3  | 0.0 ± 0.0 | 0.021 | -∞     |
| <b>QSOX1</b>    | IPI00003590 | 83  | 7.4 ± 0.3  | 0.0 ± 0.0 | 0.000 | -∞     |
| <b>RNASE4</b>   | IPI00029699 | 17  | 1.3 ± 0.3  | 0.0 ± 0.0 | 0.001 | -∞     |
| <b>SCG2</b>     | IPI00009362 | 71  | 0.4 ± 0.0  | 0.0 ± 0.0 | N/A   | -∞     |
| <b>SERPINE1</b> | IPI00007118 | 45  | 1.4 ± 0.6  | 0.0 ± 0.0 | 0.017 | -∞     |
| <b>SERPINE2</b> | IPI00914848 | 44  | 4.5 ± 0.9  | 0.0 ± 0.0 | 0.001 | -∞     |
| <b>SERPING1</b> | IPI00879931 | 59  | 0.5 ± 0.1  | 0.0 ± 0.0 | 0.000 | -∞     |
| <b>SERPINI1</b> | IPI00016150 | 46  | 0.7 ± 0.3  | 0.0 ± 0.0 | 0.017 | -∞     |
| <b>SPINT1</b>   | IPI00376403 | 58  | 0.9 ± 0.1  | 0.0 ± 0.0 | 0.000 | -∞     |
| <b>TF</b>       | IPI00945626 | 63  | 0.8 ± 0.1  | 0.0 ± 0.0 | 0.000 | -∞     |
| <b>TGFB1</b>    | IPI00000075 | 44  | 1.1 ± 0.5  | 0.0 ± 0.0 | 0.018 | -∞     |
| <b>THBS1</b>    | IPI00296099 | 129 | 1.1 ± 0.3  | 0.0 ± 0.0 | 0.003 | -∞     |
| <b>TINAGL1</b>  | IPI00005563 | 52  | 0.5 ± 0.2  | 0.0 ± 0.0 | 0.018 | -∞     |
| <b>VCAN</b>     | IPI00009802 | 373 | 1.4 ± 0.8  | 0.0 ± 0.0 | 0.029 | -∞     |
| <b>VWA1</b>     | IPI00396383 | 47  | 0.4 ± 0.2  | 0.0 ± 0.0 | 0.019 | -∞     |
| <b>COL6A1</b>   | IPI00291136 | 109 | 7.2 ± 1.7  | 0.3 ± 0.6 | 0.002 | -4.430 |
| <b>COL12A1</b>  | IPI00329573 | 333 | 20.9 ± 4.0 | 1.0 ± 1.0 | 0.001 | -4.382 |
| <b>APP</b>      | IPI00219187 | 83  | 6.0 ± 0.8  | 0.3 ± 0.6 | 0.000 | -4.174 |
| <b>PCSK9</b>    | IPI00387168 | 74  | 6.0 ± 0.4  | 0.7 ± 0.6 | 0.000 | -3.164 |
| <b>GAS6</b>     | IPI00032532 | 75  | 2.9 ± 0.1  | 0.3 ± 0.6 | 0.002 | -3.116 |
| <b>LSR</b>      | IPI00409640 | 71  | 2.3 ± 0.2  | 0.3 ± 0.6 | 0.005 | -2.814 |
| <b>TIMP2</b>    | IPI00027166 | 24  | 2.2 ± 0.5  | 0.3 ± 0.6 | 0.015 | -2.714 |
| <b>IGFBP2</b>   | IPI00297284 | 35  | 3.8 ± 0.5  | 0.7 ± 0.6 | 0.002 | -2.507 |
| <b>MSLN</b>     | IPI00793649 | 71  | 1.7 ± 0.4  | 0.3 ± 0.6 | 0.026 | -2.333 |
| <b>KLK6</b>     | IPI00023845 | 27  | 3.1 ± 0.2  | 0.7 ± 1.2 | 0.023 | -2.229 |
| <b>FRAS1</b>    | IPI00455316 | 444 | 3.1 ± 0.4  | 0.7 ± 1.2 | 0.027 | -2.211 |
| <b>CLU</b>      | IPI00400826 | 58  | 4.4 ± 0.5  | 1.0 ± 1.0 | 0.006 | -2.142 |
| <b>NUCB1</b>    | IPI00295542 | 54  | 2.3 ± 0.5  | 0.7 ± 0.6 | 0.021 | -1.814 |
| <b>CST6</b>     | IPI00019954 | 17  | 2.2 ± 0.3  | 0.7 ± 0.6 | 0.015 | -1.740 |
| <b>CPA4</b>     | IPI00008894 | 47  | 4.3 ± 1.2  | 1.3 ± 0.6 | 0.020 | -1.675 |

<sup>a</sup>Rsc: the log<sub>2</sub> ratio of protein abundance between the GKB-treated and control-treated group calculated using equation (1).

<sup>b</sup>N/A: not available, where standard deviations for both groups were 0.

**Table S2.** List of the up-regulated secretory proteins (56 proteins).

| Gene symbol | Accession # | MW  | Mean $\pm$ SD<br>of Control | Mean $\pm$ SD<br>of GKB treated | <i>p</i> value | Rsc <sup>a</sup> |
|-------------|-------------|-----|-----------------------------|---------------------------------|----------------|------------------|
| STXBP2      | IPI00943192 | 66  | 0.1 $\pm$ 0.2               | 9.3 $\pm$ 2.9                   | 0.005          | 6.316            |
| LAMB4       | IPI00295437 | 194 | 0.1 $\pm$ 0.1               | 5.3 $\pm$ 1.5                   | 0.004          | 6.093            |
| HSPD1       | IPI00784154 | 61  | 1.4 $\pm$ 0.6               | 75.0 $\pm$ 15.7                 | 0.001          | 5.778            |
| HDLBP       | IPI00894287 | 138 | 0.1 $\pm$ 0.1               | 4.3 $\pm$ 2.1                   | 0.025          | 5.209            |
| TLN1        | IPI00298994 | 270 | 1.7 $\pm$ 0.6               | 44.3 $\pm$ 6.1                  | 0.000          | 4.689            |
| CAPZA2      | IPI00026182 | 33  | 0.5 $\pm$ 0.2               | 10.7 $\pm$ 2.1                  | 0.001          | 4.508            |
| YARS        | IPI00007074 | 59  | 1.2 $\pm$ 0.5               | 25.0 $\pm$ 5.3                  | 0.001          | 4.368            |
| COPA        | IPI00646493 | 139 | 0.9 $\pm$ 0.4               | 18.0 $\pm$ 7.2                  | 0.015          | 4.325            |
| AIMP1       | IPI00793201 | 37  | 0.5 $\pm$ 0.3               | 10.0 $\pm$ 3.6                  | 0.011          | 4.193            |
| RBMX        | IPI00304692 | 42  | 0.6 $\pm$ 0.2               | 10.3 $\pm$ 4.5                  | 0.020          | 4.047            |
| KARS        | IPI00307092 | 71  | 0.9 $\pm$ 0.4               | 14.0 $\pm$ 2.0                  | 0.000          | 4.026            |
| CAPZA1      | IPI00005969 | 33  | 0.9 $\pm$ 0.5               | 14.3 $\pm$ 1.2                  | 0.000          | 3.935            |
| ISG15       | IPI00375631 | 18  | 0.3 $\pm$ 0.2               | 4.7 $\pm$ 1.5                   | 0.008          | 3.901            |
| PPIA        | IPI00419585 | 18  | 3.9 $\pm$ 0.5               | 57.7 $\pm$ 1.2                  | 0.000          | 3.870            |
| HMGB1       | IPI00419258 | 25  | 2.4 $\pm$ 0.1               | 34.7 $\pm$ 2.3                  | 0.000          | 3.839            |
| FLNA        | IPI00333541 | 281 | 7.6 $\pm$ 0.8               | 105.3 $\pm$ 6.0                 | 0.000          | 3.790            |
| HSPH1       | IPI00218993 | 92  | 2.3 $\pm$ 1.0               | 31.0 $\pm$ 5.6                  | 0.001          | 3.774            |
| SERPINB5    | IPI00783625 | 42  | 1.0 $\pm$ 0.4               | 13.3 $\pm$ 2.9                  | 0.002          | 3.715            |
| GARS        | IPI00783097 | 83  | 3.7 $\pm$ 0.8               | 48.3 $\pm$ 9.8                  | 0.001          | 3.703            |
| ACTN4       | IPI00013808 | 105 | 9.7 $\pm$ 1.1               | 125.0 $\pm$ 11.3                | 0.000          | 3.684            |
| C19orf10    | IPI00056357 | 19  | 0.9 $\pm$ 0.1               | 11.3 $\pm$ 1.5                  | 0.000          | 3.657            |
| ACTN1       | IPI00013508 | 103 | 6.4 $\pm$ 0.9               | 79.7 $\pm$ 14.0                 | 0.001          | 3.645            |
| PEBP1       | IPI00219446 | 21  | 2.5 $\pm$ 1.0               | 28.7 $\pm$ 6.5                  | 0.002          | 3.520            |
| TUBA4A      | IPI00007750 | 50  | 6.3 $\pm$ 1.1               | 70.7 $\pm$ 2.3                  | 0.000          | 3.490            |
| VCL         | IPI00307162 | 124 | 6.1 $\pm$ 1.5               | 68.3 $\pm$ 1.5                  | 0.000          | 3.478            |
| HMGB2       | IPI00219097 | 24  | 1.7 $\pm$ 0.4               | 18.3 $\pm$ 4.0                  | 0.002          | 3.415            |
| HDGF        | IPI00020956 | 27  | 0.6 $\pm$ 0.3               | 6.0 $\pm$ 3.0                   | 0.037          | 3.263            |
| IL18        | IPI00290198 | 22  | 1.2 $\pm$ 0.2               | 11.3 $\pm$ 2.1                  | 0.001          | 3.227            |
| RNPEP       | IPI00642211 | 73  | 1.4 $\pm$ 0.5               | 13.3 $\pm$ 3.1                  | 0.003          | 3.206            |
| GPI         | IPI00908881 | 60  | 6.2 $\pm$ 1.2               | 56.3 $\pm$ 4.2                  | 0.000          | 3.181            |
| TXN         | IPI00216298 | 12  | 0.9 $\pm$ 0.2               | 8.0 $\pm$ 1.7                   | 0.002          | 3.155            |
| WDR1        | IPI00746165 | 66  | 3.8 $\pm$ 0.3               | 33.0 $\pm$ 2.0                  | 0.000          | 3.123            |
| TPT1        | IPI00550900 | 20  | 3.4 $\pm$ 0.2               | 29.7 $\pm$ 5.0                  | 0.001          | 3.110            |
| SORD        | IPI00216057 | 38  | 2.1 $\pm$ 0.8               | 17.0 $\pm$ 2.6                  | 0.001          | 2.984            |
| P4HB        | IPI00010796 | 57  | 3.8 $\pm$ 0.9               | 30.0 $\pm$ 4.4                  | 0.001          | 2.970            |
| PRDX4       | IPI00011937 | 31  | 1.8 $\pm$ 0.3               | 13.3 $\pm$ 2.5                  | 0.001          | 2.923            |
| YBX1        | IPI00031812 | 36  | 2.4 $\pm$ 0.6               | 18.3 $\pm$ 4.9                  | 0.005          | 2.920            |
| SOD1        | IPI00218733 | 16  | 2.4 $\pm$ 0.3               | 18.0 $\pm$ 2.0                  | 0.000          | 2.917            |
| CALM3       | IPI00075248 | 17  | 0.9 $\pm$ 0.1               | 7.0 $\pm$ 1.7                   | 0.004          | 2.901            |

|                 |             |     |            |             |       |       |
|-----------------|-------------|-----|------------|-------------|-------|-------|
| <b>LGALS1</b>   | IPI00219219 | 15  | 2.2 ± 1.1  | 16.3 ± 1.5  | 0.000 | 2.901 |
| <b>SFN</b>      | IPI00013890 | 28  | 5.5 ± 0.6  | 41.0 ± 2.6  | 0.000 | 2.886 |
| <b>ALDOA</b>    | IPI00465439 | 39  | 17.4 ± 3.4 | 128.3 ± 8.5 | 0.000 | 2.881 |
| <b>SERPINB1</b> | IPI00027444 | 43  | 1.9 ± 0.4  | 13.7 ± 3.8  | 0.006 | 2.866 |
| <b>GSR</b>      | IPI00759575 | 52  | 2.5 ± 0.3  | 18.0 ± 2.6  | 0.001 | 2.848 |
| <b>LGALS3</b>   | IPI00465431 | 26  | 0.9 ± 0.2  | 6.7 ± 0.6   | 0.000 | 2.830 |
| <b>ANXA2</b>    | IPI00418169 | 40  | 4.8 ± 0.9  | 33.0 ± 4.0  | 0.000 | 2.768 |
| <b>MIF</b>      | IPI00293276 | 12  | 0.9 ± 0.6  | 6.0 ± 2.6   | 0.032 | 2.740 |
| <b>CA2</b>      | IPI00218414 | 29  | 0.9 ± 0.5  | 5.0 ± 1.0   | 0.003 | 2.477 |
| <b>IDE</b>      | IPI00220373 | 118 | 1.7 ± 0.4  | 9.3 ± 3.2   | 0.015 | 2.441 |
| <b>ALCAM</b>    | IPI00015102 | 65  | 2.5 ± 0.2  | 12.3 ± 5.0  | 0.028 | 2.280 |
| <b>CALR</b>     | IPI00020599 | 48  | 2.1 ± 0.2  | 8.7 ± 2.5   | 0.011 | 2.012 |
| <b>HIST1H4B</b> | IPI00453473 | 11  | 2.9 ± 0.3  | 11.7 ± 4.2  | 0.022 | 1.994 |
| <b>PSAP</b>     | IPI00012503 | 58  | 1.5 ± 0.6  | 5.7 ± 0.6   | 0.001 | 1.933 |
| <b>GSN</b>      | IPI00026314 | 86  | 4.2 ± 0.4  | 12.0 ± 1.7  | 0.002 | 1.522 |
| <b>CD9</b>      | IPI00215997 | 25  | 2.5 ± 0.4  | 5.7 ± 1.2   | 0.012 | 1.158 |
| <b>GPC4</b>     | IPI00232571 | 62  | 0.5 ± 0.1  | 1.0 ± 0.0   | 0.001 | 1.093 |

<sup>a</sup>Rsc: the log<sub>2</sub> ratio of protein abundance between the GKB-treated and the control-treated group calculated using equation (1).

**Table S3.** Summary of the secretory proteins that have a high degree of interaction.

| Gene Symbol     | N of interactions <sup>a</sup> | Rsc   | GO term related to apoptosis                                     | Function <sup>b</sup>                                                                                                      | Ref. |
|-----------------|--------------------------------|-------|------------------------------------------------------------------|----------------------------------------------------------------------------------------------------------------------------|------|
| <b>FN1</b>      | 37                             | -∞    |                                                                  | pro-apoptotic                                                                                                              | 1    |
| <b>TGFB1</b>    | 24                             | -∞    | Induction of apoptosis                                           | Induces B lymphoid cell apoptosis by first blocking cells at the G1/S transition, followed by apoptosis                    | 2    |
| <b>APP</b>      | 22                             | -∞    | Neuron apoptosis                                                 | NMDA (N-methyl-D-aspartate) induced neuronal apoptosis was associated with an increase in cytoplasmic APP immunoreactivity | 3    |
| <b>HSPD1</b>    | 16                             | 5.85  | Caspase activation, negative or positive regulation of apoptosis | Pro- and anti-apoptotic function                                                                                           | 4    |
| <b>SERPINE1</b> | 15                             | -∞    | Negative regulation of apoptosis                                 | Anti-apoptotic                                                                                                             | 5    |
| <b>PLAT</b>     | 15                             | -∞    |                                                                  | Pro-apoptotic                                                                                                              | 6    |
| <b>TF</b>       | 14                             | -∞    |                                                                  | Tumor associated transplantation antigen that can serve as an anti-apoptotic agent                                         | 7    |
| <b>PLAU</b>     | 12                             | -∞    |                                                                  | Anti-apoptotic effect especially in mouse embryonic fibroblasts                                                            | 8    |
| <b>HSPG2</b>    | 11                             | -∞    |                                                                  | N.R. <sup>c</sup>                                                                                                          |      |
| <b>SERPING1</b> | 11                             | -∞    |                                                                  | N.R.                                                                                                                       |      |
| <b>CLU</b>      | 11                             | -1.73 | Induction of apoptosis by intracellular signals                  | Reduction of CLU-induced apoptosis                                                                                         | 9    |
| <b>SOD1</b>     | 11                             | 2.92  | DNA fragmentation during apoptosis                               | Anti-apoptotic                                                                                                             | 10   |
| <b>TXN</b>      | 11                             | 3.17  |                                                                  | Both anti-apoptotic and anti-inflammatory agent                                                                            | 11   |
| <b>ACTN4</b>    | 11                             | 3.69  | Regulation of apoptosis                                          | Increases the rate of apoptosis by interacting with and activating DNase Y during apoptosis                                | 12   |

<sup>a</sup>Number of interactions acquired from the STRING analysis.<sup>b</sup>Apoptosis-related functions described in the references.<sup>c</sup>No references found in PubMed when the gene name was searched with 'apoptosis'.

**Table S4.** Summary of the secretory proteins with low degrees of interaction.

| Gene symbol     | N of interactions <sup>a</sup> | Rsc    | GO term related to apoptosis            | Function <sup>b</sup>                                                                                                 | Ref. |
|-----------------|--------------------------------|--------|-----------------------------------------|-----------------------------------------------------------------------------------------------------------------------|------|
| <b>FGF19</b>    | 0                              | -∞     |                                         | Increases proliferation and invasion capabilities of human hepatocellular carcinoma cell lines and inhibits apoptosis | 13   |
| <b>FUCA2</b>    | 0                              | -∞     |                                         | N.R. <sup>c</sup>                                                                                                     |      |
| <b>KLK10</b>    | 0                              | -∞     |                                         | Changes in KLK expression are not related to apoptosis or cell death                                                  | 14   |
| <b>MAMDC2</b>   | 0                              | -∞     |                                         | N.R.                                                                                                                  |      |
| <b>RNASE4</b>   | 0                              | -∞     |                                         | N.R.                                                                                                                  |      |
| <b>TINAGL1</b>  | 0                              | -∞     |                                         | N.R.                                                                                                                  |      |
| <b>PCSK9</b>    | 0                              | -3.164 | positive regulation of neuron apoptosis | Regulates neuronal apoptosis by adjusting ApoER2 levels and signaling                                                 | 15   |
| <b>LSR</b>      | 0                              | -2.814 |                                         | Not significant                                                                                                       |      |
| <b>MSLN</b>     | 0                              | -2.333 |                                         | Inhibits paclitaxel-induced apoptosis through the PI3K pathway                                                        | 16   |
| <b>FRAS1</b>    | 0                              | -2.211 |                                         | N.R.                                                                                                                  |      |
| <b>NUCB1</b>    | 0                              | -1.814 |                                         | Induces autoimmune phenomena and thymic apoptosis when exogenously administered to mice                               | 17   |
| <b>CST6</b>     | 0                              | -1.740 |                                         | Anti-apoptotic effect in TNF-α induced apoptosis                                                                      | 18   |
| <b>CPA4</b>     | 0                              | -1.675 |                                         | N.R.                                                                                                                  |      |
| <b>PSAP</b>     | 0                              | 1.933  |                                         | Induces Apaf-1 and Smac-dependent mitochondrial apoptotic pathway                                                     | 19   |
| <b>HIST1H4B</b> | 0                              | 1.994  |                                         | N.R.                                                                                                                  |      |
| <b>ALCAM</b>    | 0                              | 2.280  |                                         | Induces apoptosis                                                                                                     | 20   |
| <b>TPT1</b>     | 0                              | 3.110  | anti-apoptosis                          | Target of p53, thus acts as an anti-apoptotic protein                                                                 | 21   |
| <b>RNPEP</b>    | 0                              | 3.206  |                                         | N.R.                                                                                                                  |      |
| <b>COPA</b>     | 0                              | 4.325  |                                         | Knockdown of COPA induces apoptosis and suppresses tumor growth in a mesothelioma mouse model                         | 22   |
| <b>HDLBP</b>    | 0                              | 5.209  |                                         | N.R.                                                                                                                  |      |
| <b>LAMB4</b>    | 0                              | 6.093  |                                         | N.R.                                                                                                                  |      |
| <b>STXBP2</b>   | 0                              | 6.316  |                                         | N.R.                                                                                                                  |      |

<sup>a</sup>Number of interactions acquired from the STRING analysis.<sup>b</sup>Apoptosis-related functions described in the references.<sup>c</sup>No references found in PubMed when the gene name was searched with ‘apoptosis’.

Figure S1.

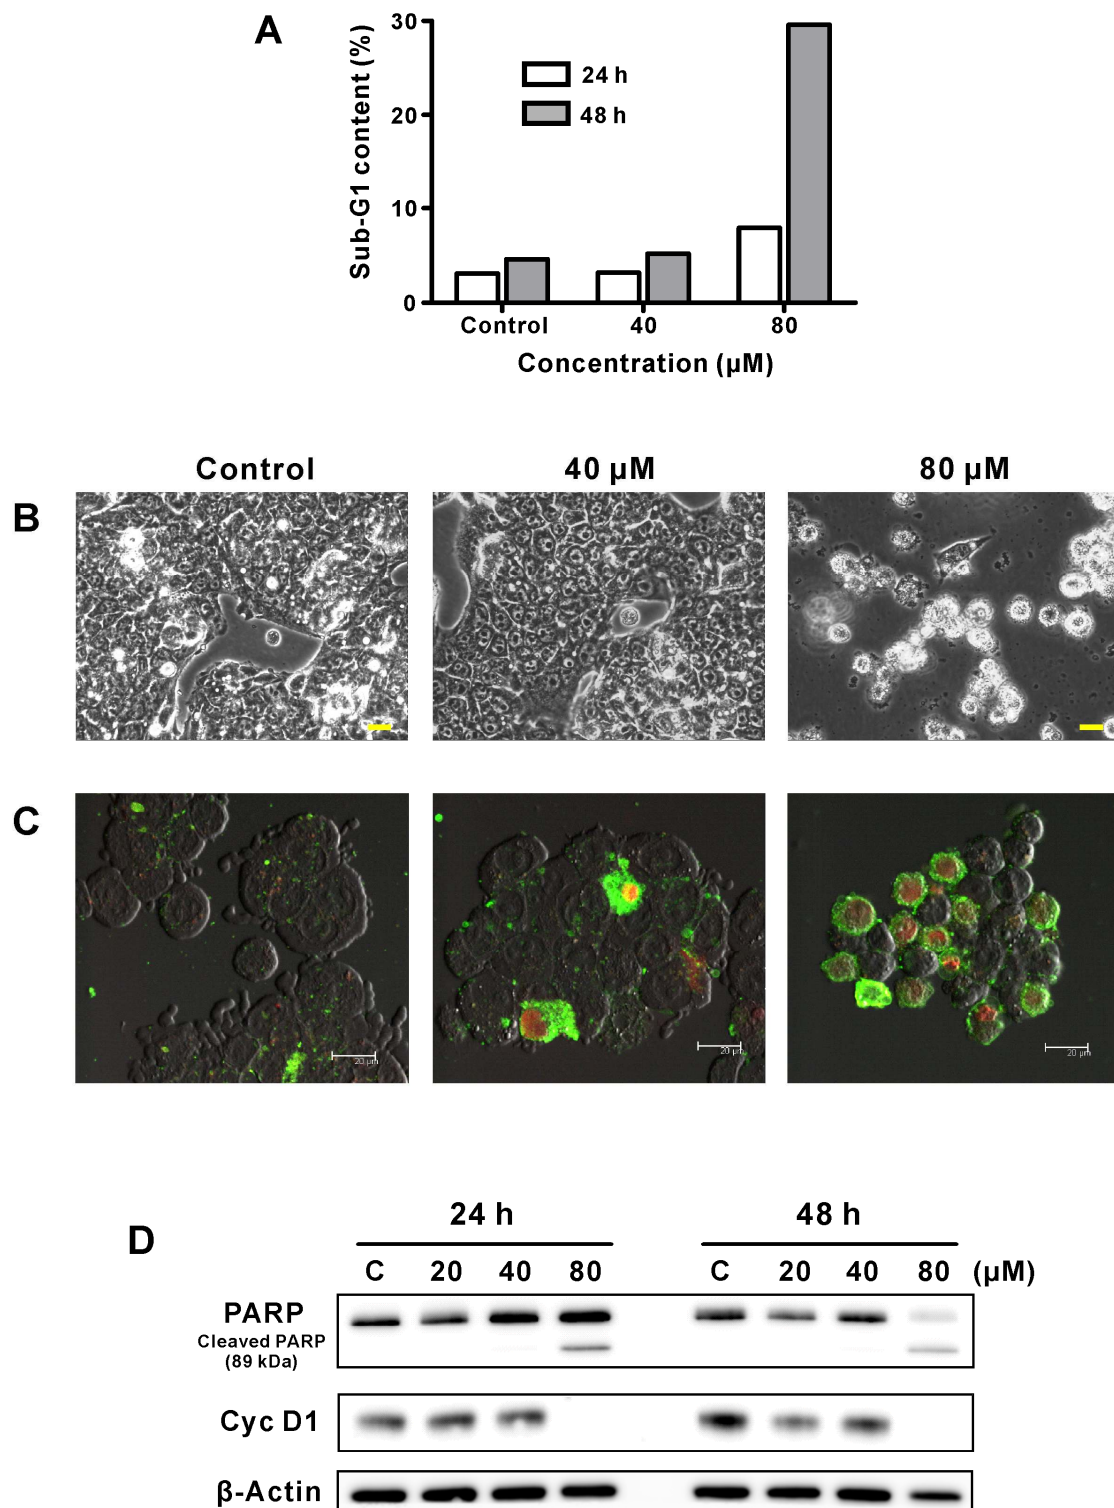

**Figure S1.** Induction of apoptotic cell death by GKB in HepG2 human hepatoma cells. (A) The sub-G1 content (%) was evaluated by flow cytometric DNA content analysis. HepG2 cells were treated with GKB (40 or 80 μM) for 24 and 48 h. (B, C) Changes in cell morphology. HepG2 cells were treated with GKB (40 or 80 μM) for 48 h. (B) Phase contrast microscope images (bar = 20 μm). (C) Confocal microscope images. The cells were stained with annexin V-fluorescein and propidium iodide (bar = 20 μm). (D) Expression levels of PARP and Cyclin D1 were measured by western blot analysis. HepG2 cells were treated with GKB (20, 40, or 80 μM) for 24 and 48 h.



**Figure S2.**

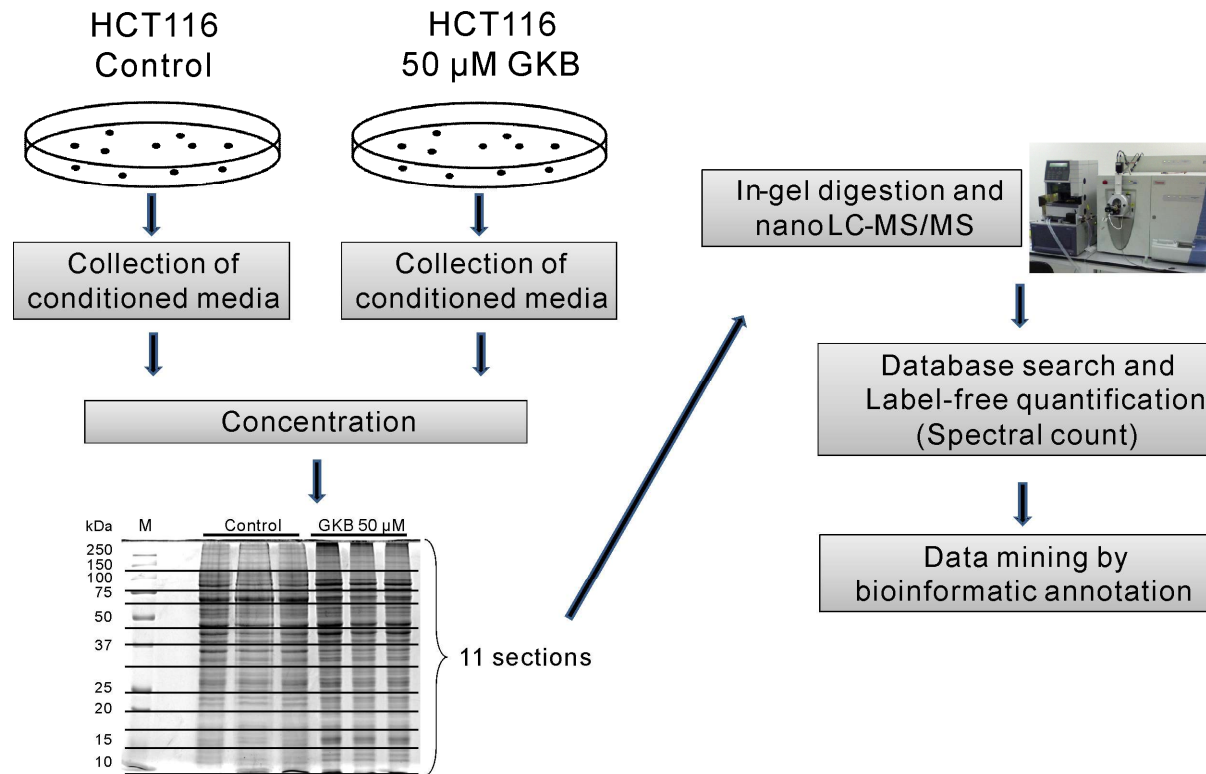

**Figure S2.** Experimental scheme for the analysis of the secreted proteome of HCT116 cells treated with GKB.

## Supporting Information References

1. Sugahara, H.; Kanakura, Y.; Furitsu, T.; Ishihara, K.; Oritani, K.; Ikeda, H.; Kitayama, H.; Ishikawa, J.; Hashimoto, K.; Kanayama, Y., Induction of programmed cell death in human hematopoietic cell lines by fibronectin via its interaction with very late antigen 5. *J. Exp. Med.* **1994**, *179*, 1757-1766.
2. Arsura, M.; Wu, M.; Sonenshein, G. E., TGF $\beta$ 1 inhibits NF- $\kappa$ B/Rel activity inducing apoptosis of B cells: transcriptional activation of I $\kappa$ B $\alpha$ . *Immunity* **1996**, *5*, 31-40.
3. Lesort, M.; Esclaire, F.; Yardin, C.; Hugon, J., NMDA induces apoptosis and necrosis in neuronal cultures. Increased APP immunoreactivity is linked to apoptotic cells. *Neurosci. Lett.* **1997**, *221*, 213-216.
4. Kim, S.-C.; Stice, J. P.; Chen, L.; Jung, J. S.; Gupta, S.; Wang, Y.; Baumgarten, G.; Trial, J.; Knowlton, A. A., Extracellular heat shock protein 60, cardiac myocytes, and apoptosis. *Circ. Res.* **2009**, *105*, 1186-1195.
5. Chen, Y.; Kelm, R. J.; Budd, R. C.; Sobel, B. E.; Schneider, D. J., Inhibition of apoptosis and caspase-3 in vascular smooth muscle cells by plasminogen activator inhibitor type-1. *J. Cell. Biochem.* **2004**, *92*, 178-188.
6. Kenagy, R. D.; Min, S.-K.; Mulvihill, E.; Clowes, A. W., A link between smooth muscle cell death and extracellular matrix degradation during vascular atrophy. *J. Vasc. Surg.* **2011**, *54*, 182-191.
7. Lesnikov, V.; Lesnikova, M.; Deega, H. J., Pro-apoptotic and anti-apoptotic effects of transferrin and transferrin-derived glycans on hematopoietic cells and lymphocytes. *Exp. Hematol.* **2001**, *29*, 477-489.
8. Mazziere, R.; Furlan, F.; D'Alessio, S.; Zonari, E.; Talotta, F.; Verde, P.; Blasi, F., A direct link between expression of urokinase plasminogen activator receptor, growth rate and oncogenic transformation in mouse embryonic fibroblasts. *Oncogene* **2006**, *26*, 725-732.
9. Yan, Y.; Luo, K.; Zhang, H.; Chai, W., RNA interference-mediated secretory clusterin gene silencing inhibits proliferation and promotes apoptosis of human non-small cell lung cancer cells. *Hepato-Gastroenterology* **2013**, *60*, 70-5.
10. Liang, H.; Arsenault, J.; Mortensen, J.; Park, F.; Johnson, C.; Nilakantan, V., Partial attenuation of cytotoxicity and apoptosis by SOD1 in ischemic renal epithelial cells. *Apoptosis* **2009**, *14*, 1176-1189.
11. Ono, R.; Masaki, T.; Dien, S.; Yu, X.; Fukunaga, A.; Yodoi, J.; Nishigori, C., Suppressing effect of recombinant human thioredoxin on ultraviolet light-induced inflammation and apoptosis in murine skin. *J. Dermatol.* **2012**, *39*, 843-851.

12. Liu, Q. Y.; Lei, J. X.; LeBlanc, J.; Sodja, C.; Ly, D.; Charlebois, C.; Walker, P. R.; Yamada, T.; Hirohashi, S.; Sikorska, M., Regulation of DNaseY activity by actinin- $\alpha$ 4 during apoptosis. *Cell Death Differ.* **2004**, *11*, 645-654.
13. Miura, S.; Mitsuhashi, N.; Shimizu, H.; Kimura, F.; Yoshidome, H.; Otsuka, M.; Kato, A.; Shida, T.; Okamura, D.; Miyazaki, M., Fibroblast growth factor 19 expression correlates with tumor progression and poorer prognosis of hepatocellular carcinoma. *BMC Cancer* **2012**, *12*, 56.
14. Paliouras, M.; Diamandis, E. P., Intracellular signaling pathways regulate hormone-dependent kallikrein gene expression. *Tumour Biol.* **2008**, *29*, 63-75.
15. Kysenius, K.; Muggalla, P.; Mätlik, K.; Arumäe, U.; Huttunen, H., PCSK9 regulates neuronal apoptosis by adjusting ApoER2 levels and signaling. *Cell. Mol. Life Sci.* **2012**, *69*, 1903-1916.
16. Chang, M. C.; Chen, C. A.; Hsieh, C. Y.; Lee, C. N.; Su, Y. N.; Hu, Y. H.; Cheng, W. F., Mesothelin inhibits paclitaxel-induced apoptosis through the PI3K pathway. *Biochem. J.* **2009**, *424*, 449-448.
17. Kanai, Y.; Kyuwa, S.; Miura, K.; Kurosawa, Y., Induction and natural occurrence of serum nucleosomal DNA in autoimmune MRL/lpr/lpr mice: its relation to apoptosis in the thymus. *Immunol. Lett.* **1995**, *46*, 207-14.
18. Vigneswaran, N.; Wu, J.; Zacharias, W., Upregulation of cystatin M during the progression of oropharyngeal squamous cell carcinoma from primary tumor to metastasis. *Oral Oncol.* **2003**, *39*, 559-568.
19. Li, T.; Zeng, L.; Gao, W.; Cui, M.-Z.; Fu, X.; Xu, X., PSAP induces a unique Apaf-1 and Smac-dependent mitochondrial apoptotic pathway independent of Bcl-2 family proteins. *Biochim. Biophys. Acta* **2013**, *1832*, 453-474.
20. Hein, S.; Müller, V.; Köhler, N.; Wikman, H.; Krenkel, S.; Streichert, T.; Schweizer, M.; Riethdorf, S.; Assmann, V.; Ihnen, M.; Beck, K.; Issa, R.; Jänicke, F.; Pantel, K.; Milde-Langosch, K., Biologic role of activated leukocyte cell adhesion molecule overexpression in breast cancer cell lines and clinical tumor tissue. *Breast Cancer Res. Treat.* **2011**, *129*, 347-360.
21. Chen, W.; Wang, H.; Tao, S.; Zheng, Y.; Wu, W.; Lian, F.; Jaramillo, M.; Fang, D.; Zhang, D. D., Tumor protein translationally controlled 1 is a p53 target gene that promotes cell survival. *Cell Cycle* **2013**, *12*, 2321-2328.
22. Sudo, H.; Tsuji, A. B.; Sugyo, A.; Kohda, M.; Sogawa, C.; Yoshida, C.; Harada, Y.-n.; Hino, O.; Saga, T., Knockdown of COPA, identified by loss-of-function screen, induces apoptosis and suppresses tumor growth in mesothelioma mouse model. *Genomics* **2010**, *95*, 210-216.
